# Supplementary material for: Accurate prediction of 11B NMR chemical shift of BODIPYs via machine learning
Source: Royal Society of Chemistry journal article supplement (doi:10.1039/d3cp00253e), 2023-01-01
Supplement: d3cp00253e1.pdf [file d3cp00253e1.pdf]

## **Electronic Supplementary Information**

### **Accurate prediction of $^{11}\text{B}$ NMR chemical shift of BODIPYs via machine learning**

Alexander A. Ksenofontov, Yaroslav I. Isaev, Michail M. Lukanov, Dmitry M. Makarov, Varvara A. Eventova, Ilya A. Khodov, Mechail B. Berezin

**Table S1.** DFT/GIAO calculations of  $^{11}\text{B}$  chemical shift for compounds in the TEST set.

| № | Compound                                                                            | aug-cc-pVDZ    |                      | aug-cc-pVTZ    |                      |
|---|-------------------------------------------------------------------------------------|----------------|----------------------|----------------|----------------------|
|   |                                                                                     | $\sigma$ , ppm | $\Delta\delta$ , ppm | $\sigma$ , ppm | $\Delta\delta$ , ppm |
| 0 | $\text{BF}_3 \cdot \text{EtO}_2$                                                    | 110.754        | 0.000                | 104.070        | 0.000                |
| 1 | 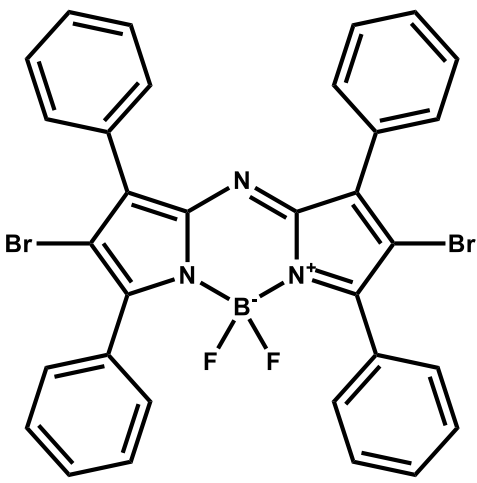  | 108.166        | 2.588                | 103.352        | 0.718                |
| 2 |  | 111.152        | -0.397               | 105.951        | -1.881               |

|   |                                                                                     |         |        |         |        |
|---|-------------------------------------------------------------------------------------|---------|--------|---------|--------|
| 3 | 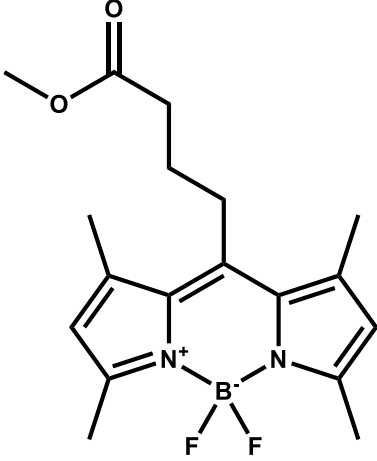   | 110.860 | -0.106 | 105.463 | -1.393 |
| 4 |   | 110.558 | 0.196  | 105.743 | -1.673 |
| 5 |  | 111.111 | -0.357 | 105.530 | -1.460 |

|   |                                                                                     |          |        |         |        |
|---|-------------------------------------------------------------------------------------|----------|--------|---------|--------|
| 6 | 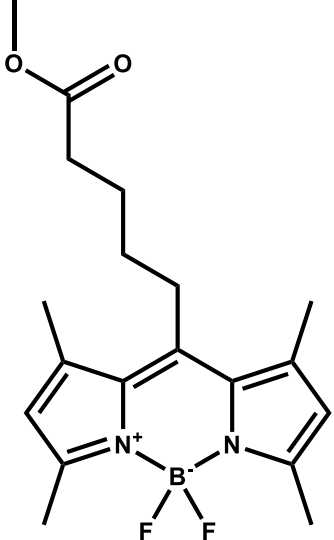   | 110.897  | -0.143 | 105.530 | -1.460 |
| 7 |   | 110.8429 | -0.089 | 105.776 | -1.706 |
| 8 |  | 110.503  | 0.251  | 105.604 | -1.534 |
| 9 |  | 110.575  | 0.179  | 105.492 | -1.422 |

|    |                                                                                     |         |       |         |        |
|----|-------------------------------------------------------------------------------------|---------|-------|---------|--------|
| 10 | 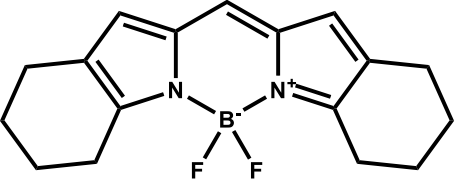   | 110.550 | 0.204 | 105.653 | -1.583 |
| 11 |    | 110.540 | 0.214 | 105.556 | -1.486 |
| 12 |   | 110.283 | 0.472 | 105.479 | -1.409 |
| 13 |  | 110.644 | 0.110 | 105.308 | -1.238 |

|    |                                                                                     |         |       |         |        |
|----|-------------------------------------------------------------------------------------|---------|-------|---------|--------|
| 14 | 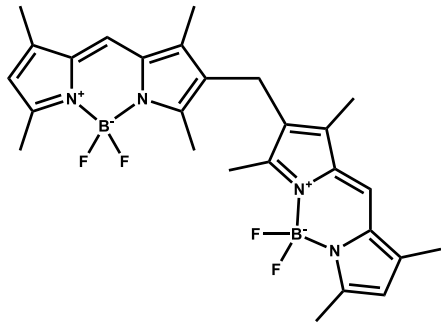   | 110.494 | 0.260 | 105.542 | -1.472 |
| 15 |    | 110.126 | 0.628 | 105.193 | -1.123 |
| 16 |  | 110.343 | 0.411 | 105.552 | -1.482 |
| 17 |  | 110.437 | 0.317 | 105.372 | -1.302 |

|    |                                                                                     |         |        |         |        |
|----|-------------------------------------------------------------------------------------|---------|--------|---------|--------|
| 18 | 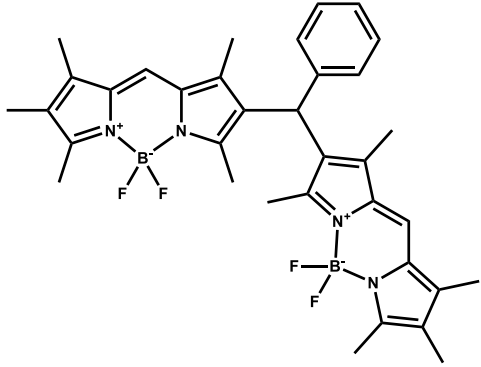   | 110.369 | 0.385  | 105.547 | -1.477 |
| 19 |    | 110.424 | 0.330  | 105.384 | -1.314 |
| 20 |   | 110.446 | 0.308  | 105.393 | -1.323 |
| 21 |  | 110.855 | -0.101 | 105.458 | -1.388 |
| 22 |  | 110.469 | 0.285  | 105.411 | -1.341 |

|    |                                                                                     |         |       |         |        |
|----|-------------------------------------------------------------------------------------|---------|-------|---------|--------|
| 23 | 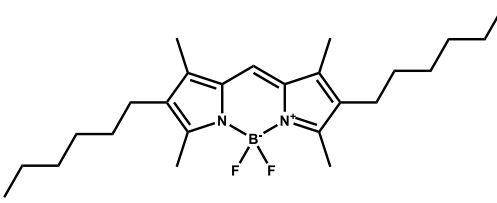   | 110.431 | 0.323 | 105.312 | -1.242 |
| 24 |    | 110.358 | 0.396 | 105.411 | -1.341 |
| 25 |   | 110.351 | 0.403 | 105.311 | -1.241 |
| 26 |  | 110.578 | 0.177 | 105.783 | -1.713 |



|    |                                                                                     |         |       |         |        |
|----|-------------------------------------------------------------------------------------|---------|-------|---------|--------|
| 27 | 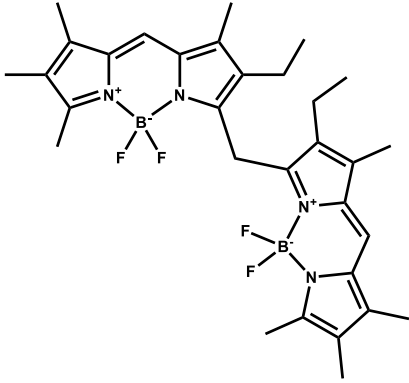   | 109.989 | 0.765 | 105.404 | -1.334 |
| 28 |   | 109.467 | 1.287 | 105.219 | -1.149 |
| 29 |  | 109.836 | 0.919 | 104.714 | -0.644 |

**Table S2.**  $^{11}\text{B}$  NMR spectra of BODIPYs in  $\text{CDCl}_3$ .

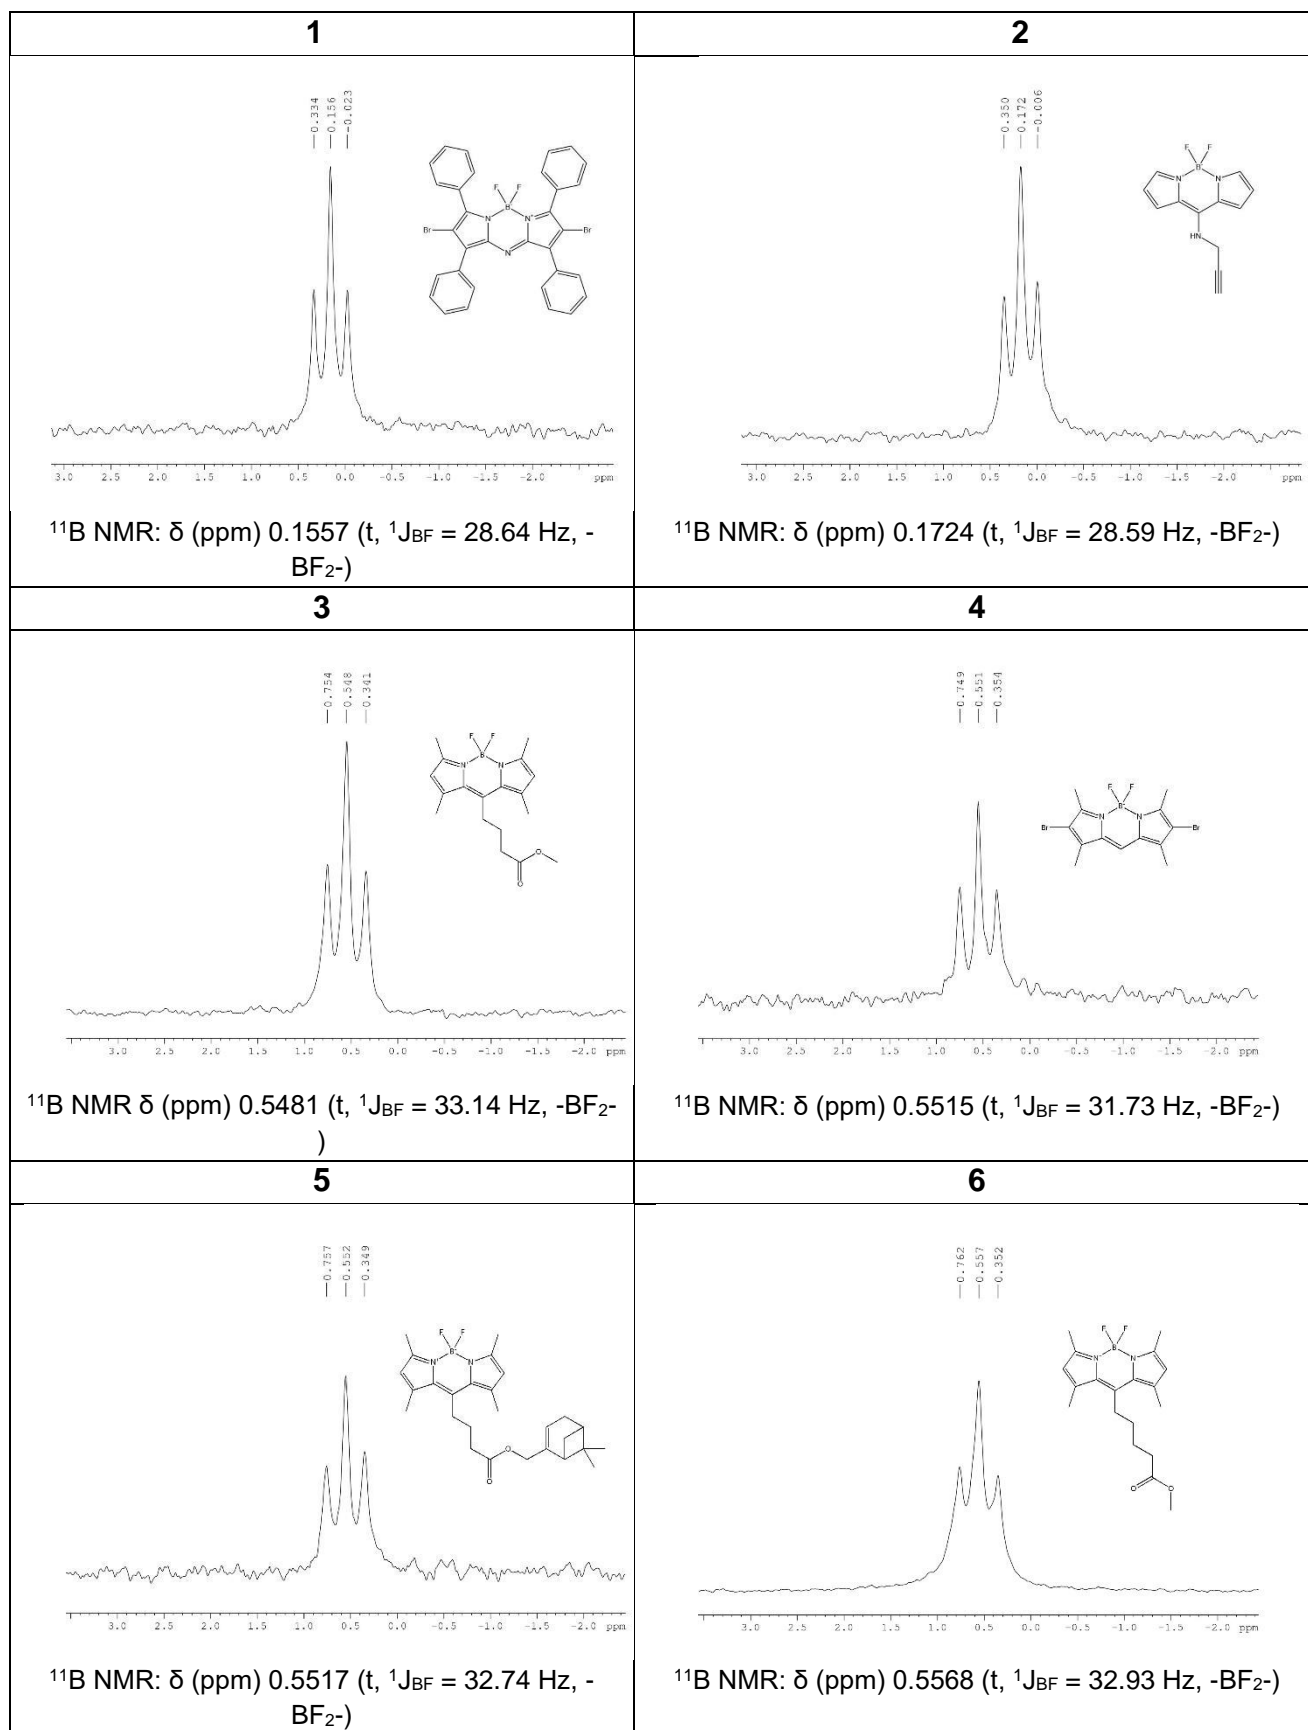

**7**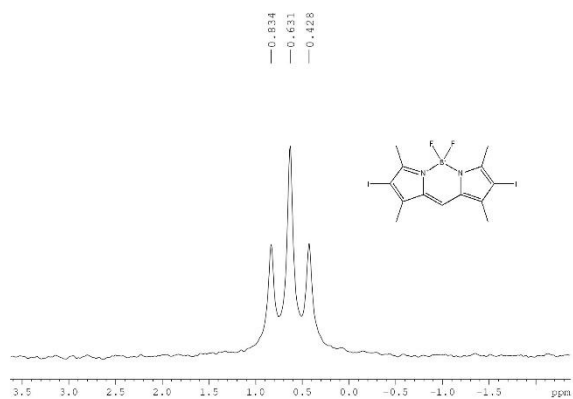 $^{11}\text{B}$  NMR:  $\delta$  (ppm) 0.6309 (t,  $^1J_{\text{BF}} = 32.55$  Hz,  $-\text{BF}_2^-$ )**8**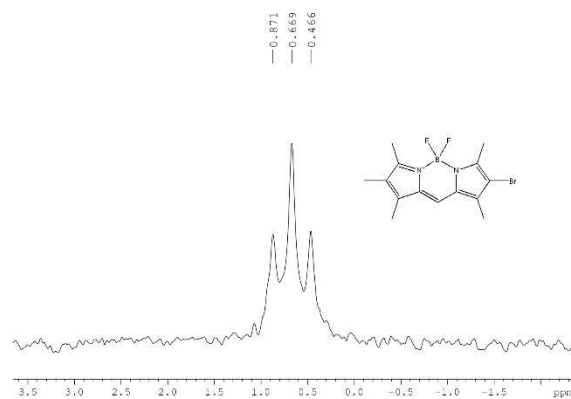 $^{11}\text{B}$  NMR:  $\delta$  (ppm) 0.6692 (t,  $^1J_{\text{BF}} = 32.55$  Hz,  $-\text{BF}_2^-$ )**9**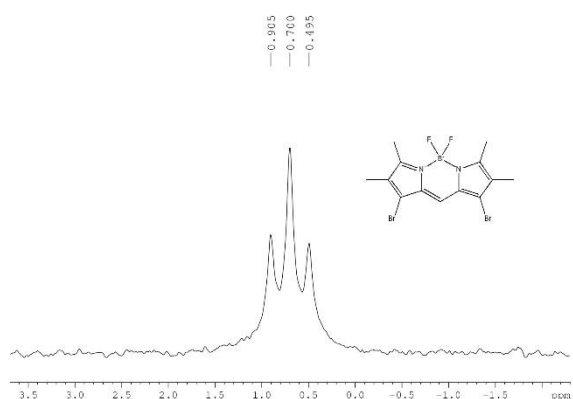 $^{11}\text{B}$  NMR:  $\delta$  (ppm) 0.6999 (t,  $^1J_{\text{BF}} = 32.90$  Hz,  $-\text{BF}_2^-$ )**10**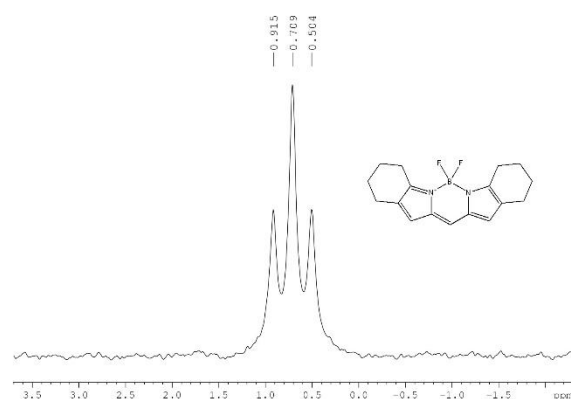 $^{11}\text{B}$  NMR:  $\delta$  (ppm) 0.7094 (t,  $^1J_{\text{BF}} = 32.94$  Hz,  $-\text{BF}_2^-$ )**11**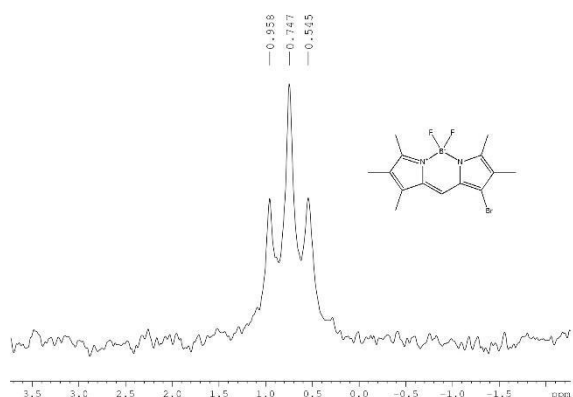 $^{11}\text{B}$  NMR:  $\delta$  (ppm) 0.7475 (t,  $^1J_{\text{BF}} = 33.16$  Hz,  $-\text{BF}_2^-$ )**12**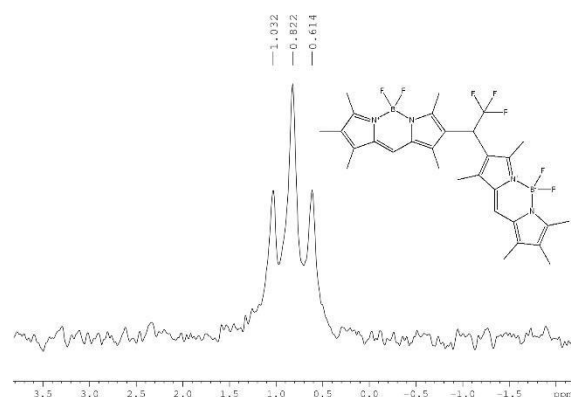 $^{11}\text{B}$  NMR:  $\delta$  (ppm) 0.8225 (t,  $^1J_{\text{BF}} = 33.53$  Hz,  $-\text{BF}_2^-$ )

**13**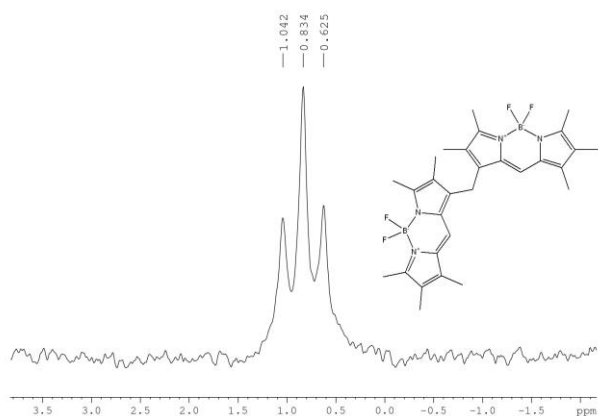 $^{11}\text{B}$  NMR:  $\delta$  (ppm) 0.8345 (t,  $^1J_{\text{BF}} = 33.47$  Hz,  $-\text{BF}_2^-$ )**14**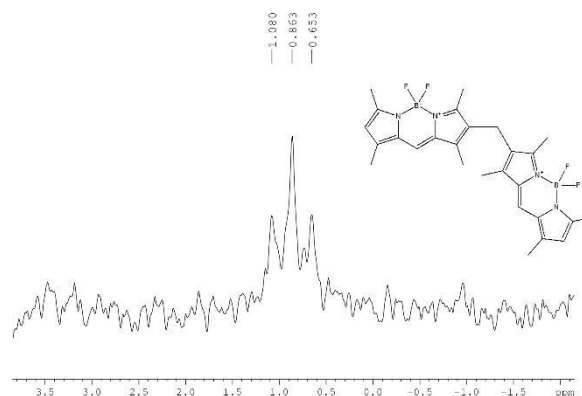 $^{11}\text{B}$  NMR:  $\delta$  (ppm) 0.8635 (t,  $^1J_{\text{BF}} = 34.27$  Hz,  $-\text{BF}_2^-$ )**15**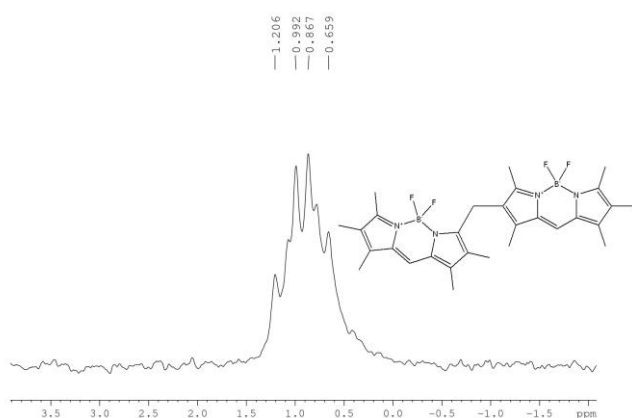 $^{11}\text{B}$  NMR:  $\delta$  (ppm) 0.8665 (m,  $-\text{BF}_2^-$ )**16**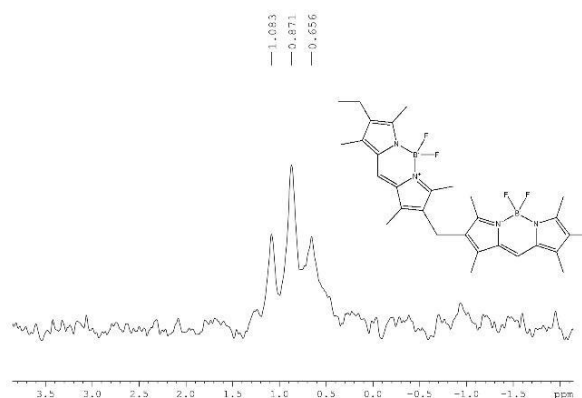 $^{11}\text{B}$  NMR:  $\delta$  (ppm) 0.8707 (t,  $^1J_{\text{BF}} = 34.28$  Hz,  $-\text{BF}_2^-$ )**17**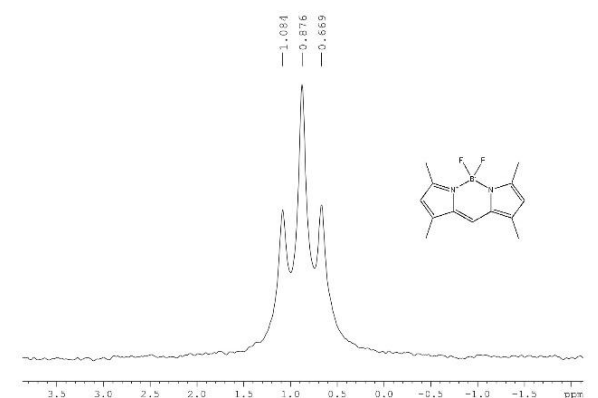 $^{11}\text{B}$  NMR:  $\delta$  (ppm) 0.8764 (t,  $^1J_{\text{BF}} = 33.25$  Hz,  $-\text{BF}_2^-$ )**18**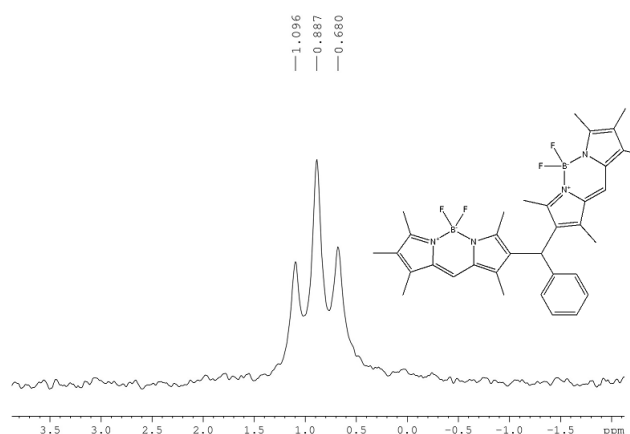 $^{11}\text{B}$  NMR:  $\delta$  (ppm) 0.8872 (t,  $^1J_{\text{BF}} = 33.39$  Hz,  $-\text{BF}_2^-$ )

**19**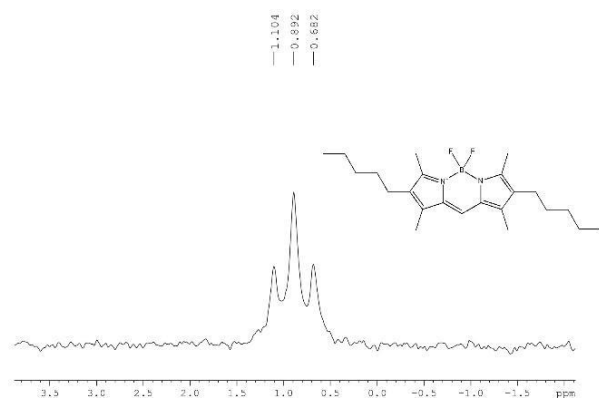 $^{11}\text{B}$  NMR:  $\delta$  (ppm) 0.8920 (t,  $^1J_{\text{BF}} = 33.80$  Hz,  $-\text{BF}_2^-$ )**20**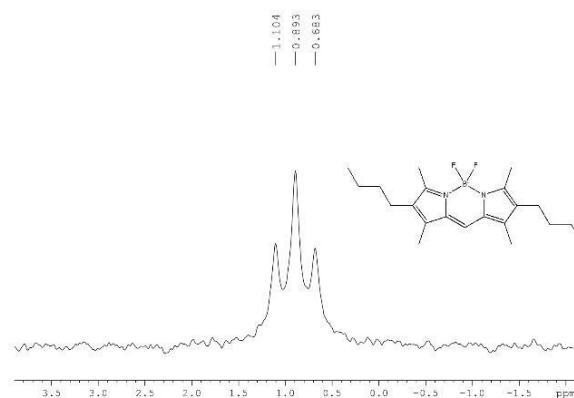 $^{11}\text{B}$  NMR:  $\delta$  (ppm) 0.8929 (t,  $^1J_{\text{BF}} = 33.84$  Hz,  $-\text{BF}_2^-$ )**21**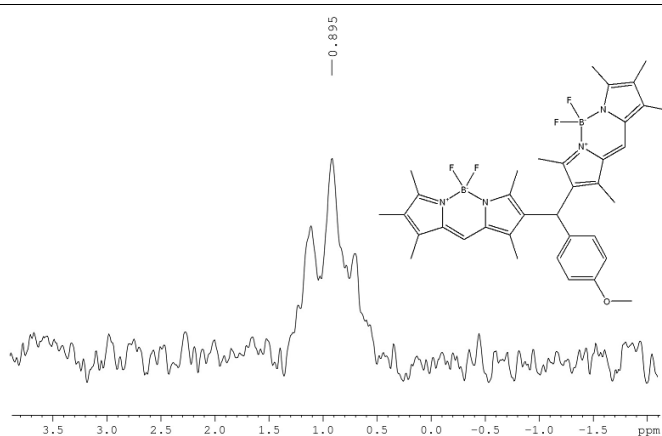 $^{11}\text{B}$  NMR:  $\delta$  (ppm) 0.8949 (t,  $^1J_{\text{BF}} = 32.69$  Hz,  $-\text{BF}_2^-$ )**22**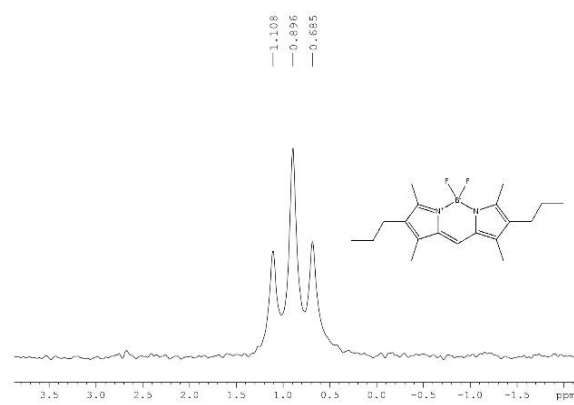 $^{11}\text{B}$  NMR:  $\delta$  (ppm) 0.8960 (t,  $^1J_{\text{BF}} = 33.89$  Hz,  $-\text{BF}_2^-$ )**23**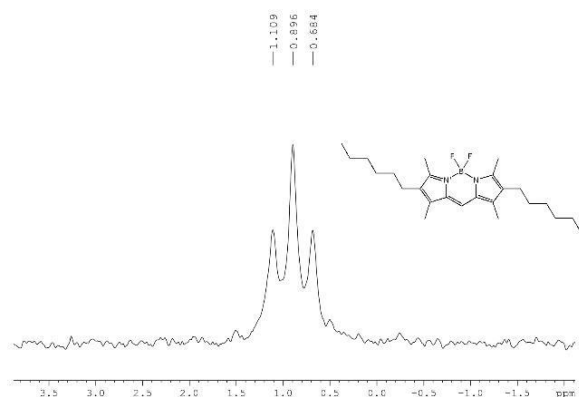 $^{11}\text{B}$  NMR:  $\delta$  (ppm) 0.8962 (t,  $^1J_{\text{BF}} = 34.12$  Hz,  $-\text{BF}_2^-$ )**24**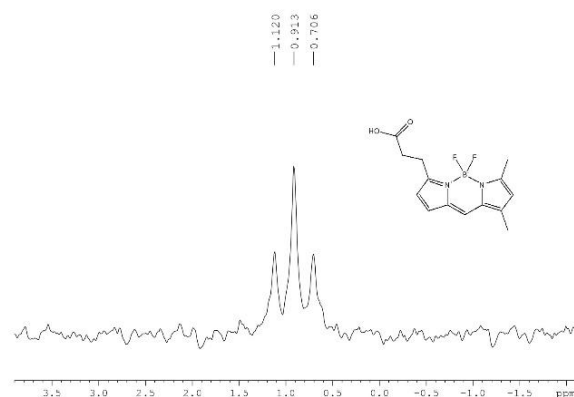 $^{11}\text{B}$  NMR:  $\delta$  (ppm) 0.9132 (t,  $^1J_{\text{BF}} = 33.25$  Hz,  $-\text{BF}_2^-$ )

**25**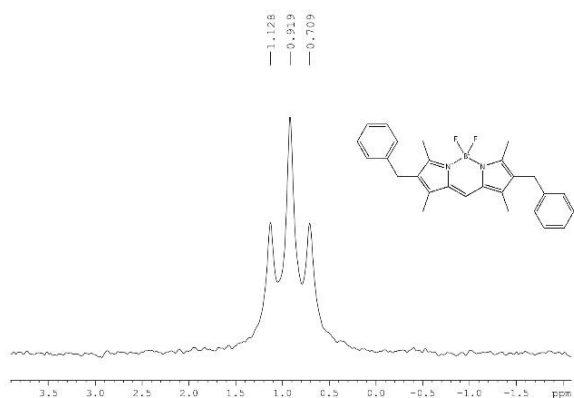

$^{11}\text{B}$  NMR:  $\delta$  (ppm) 0.9188 (t,  $^1J_{\text{BF}} = 33.60$  Hz,  $-\text{BF}_2^-$ )

**26**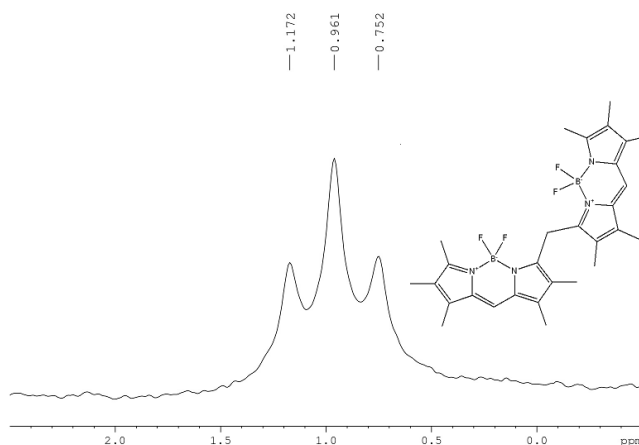

$^{11}\text{B}$  NMR:  $\delta$  (ppm) 0.9613 (t,  $^1J_{\text{BF}} = 33.71$  Hz,  $-\text{BF}_2^-$ )

**27**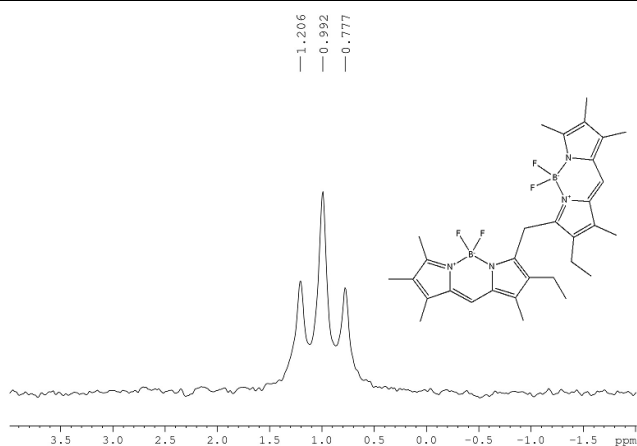

$^{11}\text{B}$  NMR:  $\delta$  (ppm) 0.9924 (t,  $^1J_{\text{BF}} = 34.39$  Hz,  $-\text{BF}_2^-$ )

**28**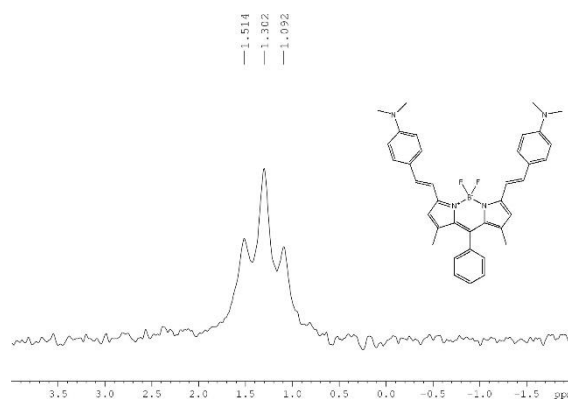

$^{11}\text{B}$  NMR:  $\delta$  (ppm) 1.3020 (t,  $^1J_{\text{BF}} = 33.85$  Hz,  $-\text{BF}_2^-$ )

**29**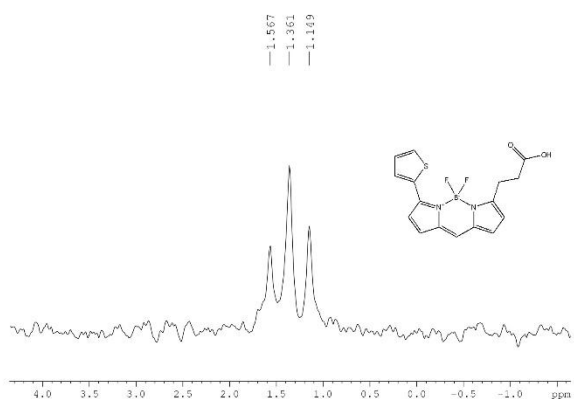

$^{11}\text{B}$  NMR:  $\delta$  (ppm) 1.3608 (t,  $^1J_{\text{BF}} = 33.53$  Hz,  $-\text{BF}_2^-$ )

**Table S3.** Statistical coefficients calculated by different models for predicting the  $^{11}\text{B}$  NMR chemical shift.

| Method/Descriptors | $R^2$              | RMSE, ppm       | MAE, ppm        | $R^2$           | RMSE, ppm       | MAE, ppm        |
|--------------------|--------------------|-----------------|-----------------|-----------------|-----------------|-----------------|
|                    | FINAL training set |                 |                 | TEST set        |                 |                 |
| RFR/alvaDesc       | $0.67 \pm 0.03$    | $0.52 \pm 0.03$ | $0.32 \pm 0.01$ | $0.40 \pm 0.20$ | $0.23 \pm 0.04$ | $0.12 \pm 0.02$ |
| RFR/Avalon         | $0.71 \pm 0.03$    | $0.47 \pm 0.02$ | $0.27 \pm 0.01$ | $0.30 \pm 0.20$ | $0.21 \pm 0.05$ | $0.14 \pm 0.03$ |
| RFR/ISIDA          | $0.80 \pm 0.03$    | $0.40 \pm 0.02$ | $0.25 \pm 0.01$ | $0.50 \pm 0.20$ | $0.17 \pm 0.05$ | $0.12 \pm 0.02$ |
| RFR/OEstat         | $0.67 \pm 0.03$    | $0.50 \pm 0.03$ | $0.30 \pm 0.01$ | $0.31 \pm 0.07$ | $0.26 \pm 0.03$ | $0.22 \pm 0.02$ |
| RFR/SOAP           | $0.54 \pm 0.03$    | $0.58 \pm 0.03$ | $0.34 \pm 0.01$ | $0.26 \pm 0.08$ | $0.28 \pm 0.03$ | $0.22 \pm 0.02$ |
| XGBoost/alvaDesc   | $0.66 \pm 0.03$    | $0.51 \pm 0.03$ | $0.31 \pm 0.01$ | $0.30 \pm 0.10$ | $0.22 \pm 0.03$ | $0.17 \pm 0.02$ |
| XGBoost/Avalon     | $0.71 \pm 0.03$    | $0.47 \pm 0.03$ | $0.27 \pm 0.01$ | $0.20 \pm 0.10$ | $0.27 \pm 0.05$ | $0.17 \pm 0.04$ |
| XGBoost/ISIDA      | $0.79 \pm 0.02$    | $0.40 \pm 0.02$ | $0.24 \pm 0.01$ | $0.44 \pm 0.09$ | $0.26 \pm 0.06$ | $0.18 \pm 0.04$ |
| XGBoost/OEstat     | $0.68 \pm 0.04$    | $0.49 \pm 0.03$ | $0.28 \pm 0.01$ | $0.20 \pm 0.20$ | $0.28 \pm 0.04$ | $0.21 \pm 0.03$ |
| DNN/alvaDesc       | $0.52 \pm 0.04$    | $0.63 \pm 0.03$ | $0.42 \pm 0.01$ | $0.06 \pm 0.10$ | $0.70 \pm 0.10$ | $0.52 \pm 0.10$ |
| DNN/Avalon         | $0.71 \pm 0.03$    | $0.47 \pm 0.03$ | $0.27 \pm 0.01$ | $0.20 \pm 0.10$ | $0.27 \pm 0.05$ | $0.17 \pm 0.04$ |
| DNN/ISIDA          | $0.61 \pm 0.03$    | $0.56 \pm 0.02$ | $0.36 \pm 0.01$ | $0.10 \pm 0.10$ | $0.38 \pm 0.06$ | $0.28 \pm 0.05$ |
| DNN/OEstat         | $0.62 \pm 0.04$    | $0.54 \pm 0.03$ | $0.32 \pm 0.01$ | $0.10 \pm 0.10$ | $0.32 \pm 0.05$ | $0.24 \pm 0.04$ |
| Transformer CNF    | $0.67 \pm 0.03$    | $0.51 \pm 0.03$ | $0.31 \pm 0.01$ | $0.60 \pm 0.10$ | $0.19 \pm 0.02$ | $0.16 \pm 0.02$ |
| Transformer CNN    | $0.71 \pm 0.03$    | $0.47 \pm 0.03$ | $0.29 \pm 0.01$ | $0.30 \pm 0.20$ | $0.28 \pm 0.06$ | $0.19 \pm 0.04$ |
| SheNet             | $0.43 \pm 0.04$    | $0.66 \pm 0.03$ | $0.45 \pm 0.01$ | $0.16 \pm 0.09$ | $0.38 \pm 0.06$ | $0.28 \pm 0.05$ |
